# Supplementary material for: Bringing to light the molecular evolution of GUX genes in plants
Source: PubMed Central journal article supplement (PMC7198009; doi:10.1590/1678-4685-gmb-2018-0208), 2020-03-23
Supplement: 1415-4757-GMB-43-1-e20180208-suppl1.pdf [file 1415-4757-GMB-43-1-e20180208-suppl1.pdf]

## Supplementary Material to “Bringing to light the molecular evolution of *GUX* genes in plants”

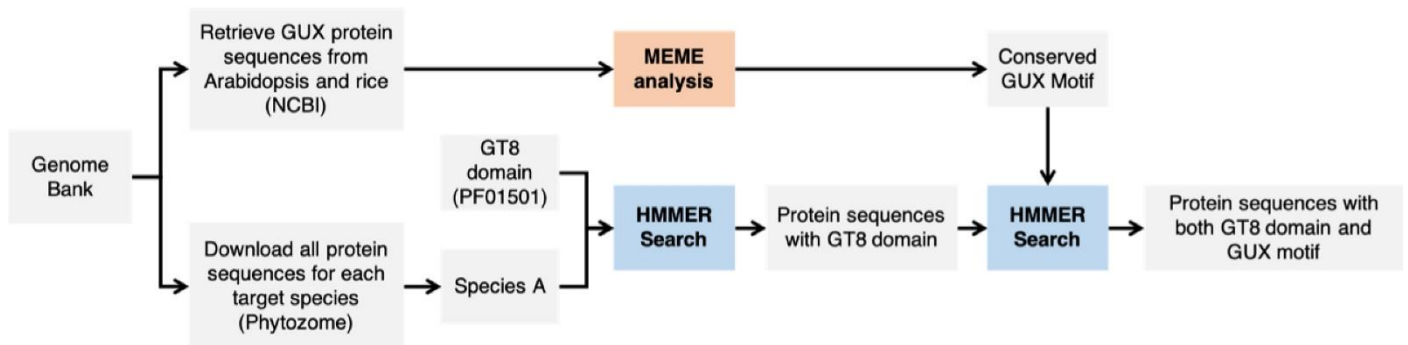

Figure S1 - Scheme of the methodology used for the screening of genes.
