# Supplementary material for: Bringing to light the molecular evolution of GUX genes in plants
Source: PubMed Central journal article supplement (PMC7198009; doi:10.1590/1678-4685-gmb-2018-0208), 2020-03-23
Supplement: 1415-4757-GMB-43-1-e20180208-suppl6.pdf [file 1415-4757-GMB-43-1-e20180208-suppl6.pdf]

## Supplementary Material to “Bringing to light the molecular evolution of *GUX* genes in plants”

**Table S1** - ESTs from Vettore *et al.* (2003) used to produce contigs for each *GUX* gene in sugarcane and the contig’s respective gene identifiers in the sugarcane monoploid genome (Garsmeur *et al.*, 2018; <http://sugarcane-genome.cirad.fr/>; blastp with e-value = 0).

| Accession number   | ESTs producing significant alignments<br>(Vettore <i>et al.</i> , 2003)                                                           | Best hits on sugarcane monoploid genome (Garsmeur <i>et al.</i> , 2018)          |
|--------------------|-----------------------------------------------------------------------------------------------------------------------------------|----------------------------------------------------------------------------------|
| sugarcane_contig1  | SCCCLR1078C05.g                                                                                                                   | Sh_251G01_p000110<br>Sh_011C11_p000080<br>Sh_248J12_p000060<br>Sh_249M20_p000010 |
| sugarcane_contig2  | SCBFAD1091C02.g<br>SCSGFL4C05H07.g<br>SCCCRZ2003G11.g<br>SCBGFL4055H08.g<br>SCCCFL4119C02.g<br>SCJLFL4099B06.g                    | Sh_143I09_contig-1_p000030                                                       |
| sugarcane_contig3  | SCBFRZ2017F10.g<br>SCJLSB1067D04.g<br>SCQGST1034D01.g<br>SCBFRZ2017F10.g<br>SCAGFL3022E11.g<br>SCQGLB2045H07.g                    | Sh_011C11_p000080<br>Sh_248J12_p000060<br>Sh_251G01_p000110<br>Sh_249M20_p000010 |
| sugarcane_contigXA | SCRURT3065E10.g<br>SCRURT3065E10.b                                                                                                | Sh_251G01_p000110<br>Sh_248J12_p000060<br>Sh_011C11_p000080                      |
| sugarcane_contigXB | SCJLFL4099B06.g<br>SCEQSB1C01A06.g<br>SCCCST3006B11.g<br>SCSBST3102D05.g<br>SCCCST3C06B11.g<br>SCSGSB1006A08.g<br>SCEZST3149H12.g | Sh_210K15_p000010                                                                |
