# Supplementary material for: Bringing to light the molecular evolution of GUX genes in plants
Source: Genet Mol Biol. 2020 Mar 23;43(1):e20180208. doi: 10.1590/1678-4685-GMB-2018-0208 (PMC7198009; doi:10.1590/1678-4685-GMB-2018-0208)
Supplement: Supplementary file 4 [file 1415-4757-GMB-43-1-e20180208-suppl3.pdf]

# Supplementary Material to “Bringing to light the molecular evolution of *GUX* genes in plants”

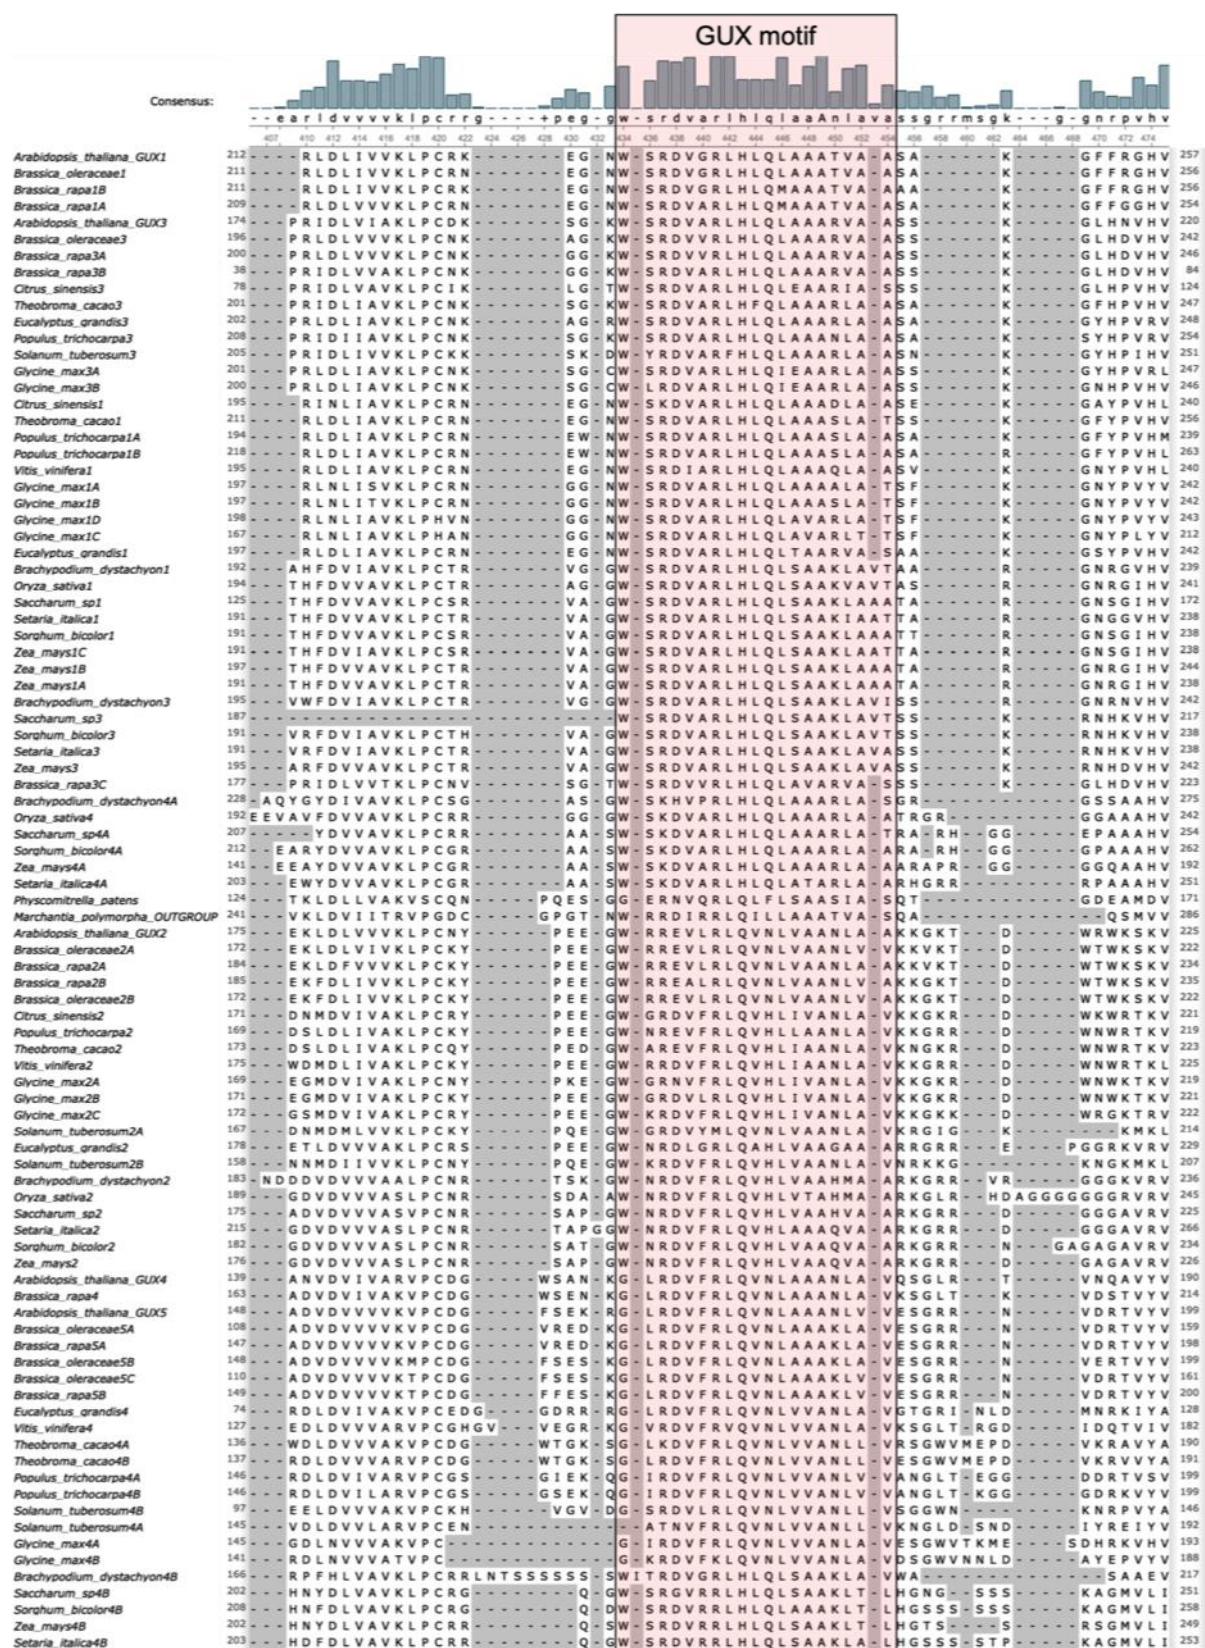

Figure S3 - GUX motif highlighted in the sequence alignment used to generate the phylogenetic tree.
